# Supplementary material for: Evaluating a Model of Added Sugar Intake Based on Amino Acid Carbon Isotope Ratios in a Controlled Feeding Study of U.S. Adults
Source: MDPI journal article supplement (doi:10.3390/nu14204308), 2022-10-14
Supplement: s1 [file s1]

Evaluating a model of added sugar intake based on amino acid carbon isotope ratios in a controlled feeding study of U.S. adults. J. J. Johnson. Supplementary Material.

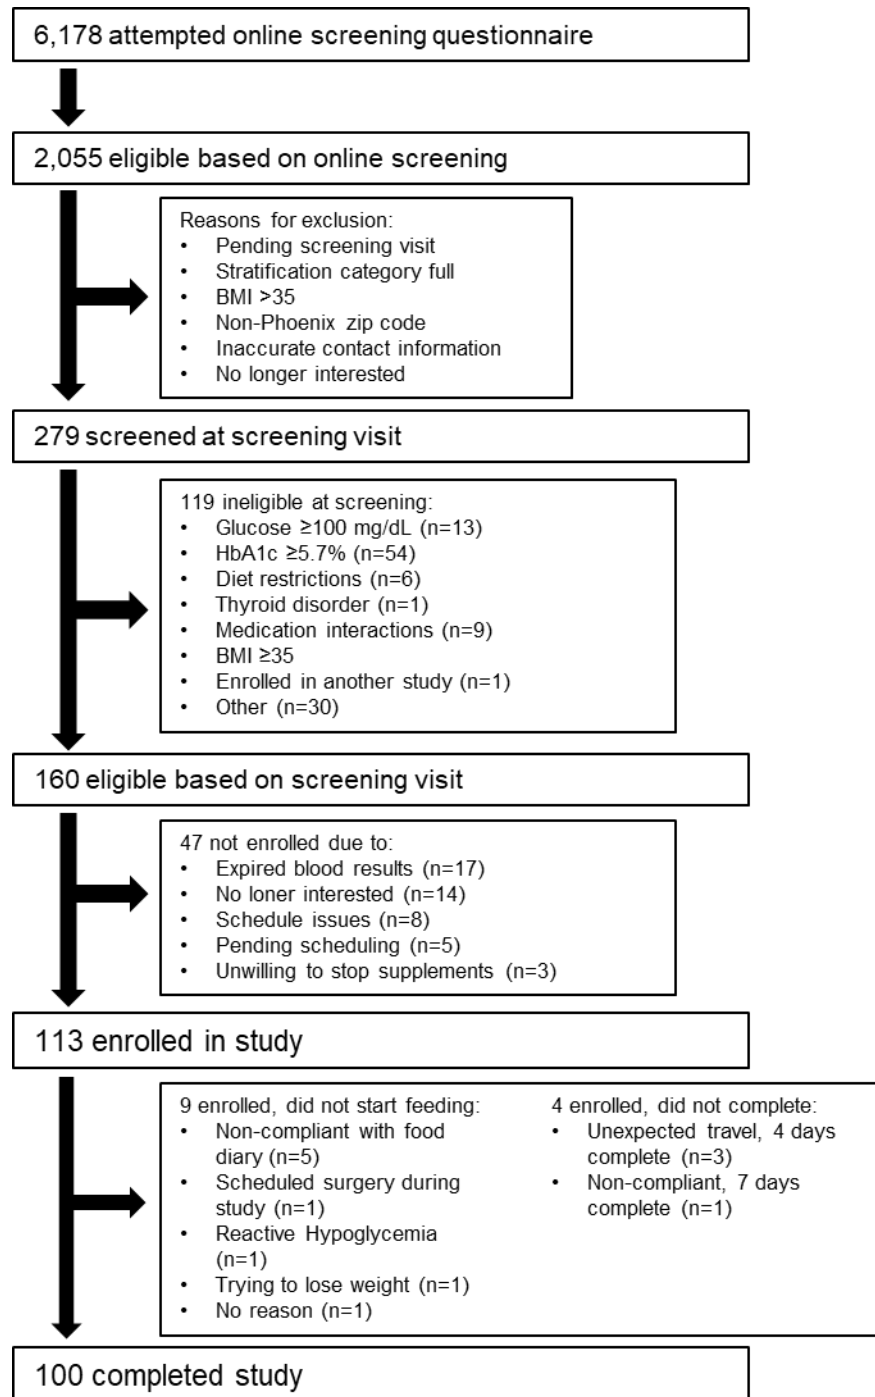

**Figure S1:** Study participant flow chart. Adapted with permission from [1].

**Table S1:** Amino acids used in the external standard and purchased from Sigma-Aldrich (St. Louis, MO, USA).

| Amino acid      | Lot number | CIR <sup>1</sup> (‰) |
|-----------------|------------|----------------------|
| L-Alanine       | BCBN6412V  | -19.17               |
| L-Aspartic acid | BCBN3442V  | -27.29               |
| L-Glutamine     | BCBM0517V  | -28.89               |
| Glycine         | SLBS1578V  | -42.27               |
| L-Histidine     | BCBL8528V  | -9.44                |
| L-Isoleucine    | BCBD5312V  | -11.24               |
| L-Leucine       | BCBM2322V  | -28.93               |
| L-Lysine        | BCBR4746V  | -28.13               |
| L-Methionine    | BCBQ3447V  | -33.93               |
| L-Phenylalanine | SLBQ7928V  | -12.18               |
| L-Proline       | BCBP4505V  | -12.24               |
| L-Serine        | 1349921V   | -13.60               |
| L-Threonine     | BCBM6171V  | -10.41               |
| L-Tyrosine      | BCBP3212V  | -24.12               |
| L-Valine        | BCBQ2367V  | -10.75               |

<sup>1</sup> Measured at the Alaska Stable Isotope Facility using elemental analyzer isotope ratio mass spectrometry. CIR (carbon isotope ratio), reported as the  $\delta^{13}\text{C}$  value in units of ‰ where  $\delta^{13}\text{C} = (\text{R}_{\text{sample}}/\text{R}_{\text{standard}} - 1) \times 1000$ ,  $\text{R} = {}^{13}\text{C}/{}^{12}\text{C}$ , and the standard is VPBD).

**Table S2:** Analytical error and between-batch reproducibility of CIR<sub>AA</sub> measurements in the check (QA) sample<sup>1</sup>.

| <b>CIR</b> | <b>Within batch SEM (‰)<sup>2</sup></b> | <b>Between batch SD (‰)<sup>3</sup></b> |
|------------|-----------------------------------------|-----------------------------------------|
| Ala        | 0.13                                    | 0.49                                    |
| Gly        | 0.25                                    | 1.33                                    |
| Val        | 0.07                                    | 0.28                                    |
| Leu        | 0.10                                    | 0.29                                    |
| Ile        | 0.14                                    | 1.12                                    |
| Thr        | 0.20                                    | 1.08                                    |
| Ser        | 0.26                                    | 1.07                                    |
| Asx        | 0.18                                    | 0.63                                    |
| Pro        | 0.19                                    | 0.78                                    |
| Glx        | 0.04                                    | 0.34                                    |
| Met        | 0.22                                    | 0.80                                    |
| Phe        | 0.05                                    | 0.18                                    |
| Lys        | 0.31                                    | 0.51                                    |
| Tyr        | 0.12                                    | 0.53                                    |
| His        | 0.33                                    | 1.09                                    |

<sup>1</sup> CIR<sub>AA</sub>, carbon isotope ratio of amino acids; QA, quality assurance

<sup>2</sup> Mean of propagated SEMs of multiple injections of AA standard and the QA sample across analytical batches ( $n = 8$ ), calculated as follows:

$$SEM\ CIR_{AA, smp} = \frac{1}{p} \times \left( \frac{SD_{d, smp}^2}{n_{d, smp}} + \frac{SD_{d, std}^2}{n_{d, std}} \right)^{1/2}$$

where,  $p$  is the proportion of carbon in the derivatized AA from the un-derivatized AA;  $SD_{d, smp}$  is the standard deviation of the measured CIR<sub>AA</sub> in the replicate injections of the sample;  $n_{d, smp}$  is the number of injections per sample;  $SD_{d, std}$  is the standard deviation of the measured CIR<sub>AA</sub> in the external standard; and,  $n_{d, std}$  is the number of injections of the external standard [2]

<sup>3</sup> SD of QA sample across analytical batches ( $n = 8$ )

**Table S3:** Correlation matrix of CIR<sub>AAS</sub> ( $n = 99$ )<sup>1</sup>.

|     | Ala | Gly  | Val  | Leu  | Ile  | Thr  | Ser  | Asx  | Pro  | Glx  | Met  | Phe  | Lys  | Tyr  | His   |
|-----|-----|------|------|------|------|------|------|------|------|------|------|------|------|------|-------|
| Ala | 1   | 0.71 | 0.73 | 0.49 | 0.51 | 0.53 | 0.48 | 0.52 | 0.64 | 0.63 | 0.53 | 0.60 | 0.51 | 0.36 | 0.24  |
| Gly | --- | 1    | 0.57 | 0.25 | 0.66 | 0.54 | 0.50 | 0.29 | 0.58 | 0.32 | 0.18 | 0.40 | 0.25 | 0.06 | 0.01  |
| Val | --- | ---  | 1    | 0.87 | 0.52 | 0.72 | 0.65 | 0.71 | 0.80 | 0.78 | 0.67 | 0.91 | 0.76 | 0.74 | 0.51  |
| Leu | --- | ---  | ---  | 1    | 0.25 | 0.56 | 0.60 | 0.82 | 0.66 | 0.81 | 0.65 | 0.91 | 0.82 | 0.87 | 0.66  |
| Ile | --- | ---  | ---  | ---  | 1    | 0.49 | 0.29 | 0.13 | 0.55 | 0.14 | 0.13 | 0.33 | 0.16 | 0.11 | -0.01 |
| Thr | --- | ---  | ---  | ---  | ---  | 1    | 0.72 | 0.56 | 0.73 | 0.57 | 0.59 | 0.75 | 0.56 | 0.49 | 0.17  |
| Ser | --- | ---  | ---  | ---  | ---  | ---  | 1    | 0.73 | 0.62 | 0.66 | 0.50 | 0.71 | 0.53 | 0.52 | 0.25  |
| Asp | --- | ---  | ---  | ---  | ---  | ---  | ---  | 1    | 0.57 | 0.88 | 0.58 | 0.80 | 0.79 | 0.76 | 0.58  |
| Pro | --- | ---  | ---  | ---  | ---  | ---  | ---  | ---  | 1    | 0.6  | 0.58 | 0.79 | 0.56 | 0.50 | 0.24  |
| Glu | --- | ---  | ---  | ---  | ---  | ---  | ---  | ---  | ---  | 1    | 0.65 | 0.84 | 0.82 | 0.77 | 0.62  |
| Met | --- | ---  | ---  | ---  | ---  | ---  | ---  | ---  | ---  | ---  | 1    | 0.72 | 0.63 | 0.65 | 0.33  |
| Phe | --- | ---  | ---  | ---  | ---  | ---  | ---  | ---  | ---  | ---  | ---  | 1    | 0.83 | 0.84 | 0.53  |
| Lys | --- | ---  | ---  | ---  | ---  | ---  | ---  | ---  | ---  | ---  | ---  | ---  | 1    | 0.82 | 0.66  |
| Tyr | --- | ---  | ---  | ---  | ---  | ---  | ---  | ---  | ---  | ---  | ---  | ---  | ---  | 1    | 0.67  |
| His | --- | ---  | ---  | ---  | ---  | ---  | ---  | ---  | ---  | ---  | ---  | ---  | ---  | ---  | 1     |

<sup>1</sup> Pearson correlation coefficients are shown. CIR<sub>AA</sub>, carbon isotope ratio of amino acid.

**Table S4:** Frequency of covariate selection in 2,000 bootstrap samples<sup>1</sup>.

| Covariate                 | Selected (%) |
|---------------------------|--------------|
| Body weight* <sup>2</sup> | 67.4         |
| Sex*                      | 54.0         |
| Age                       | 13.4         |
| Ala*                      | 97.7         |
| Gly*                      | 73.2         |
| Val*                      | 67.6         |
| Leu                       | 57.5         |
| Ile                       | 38.2         |
| Thr                       | 27.6         |
| Ser*                      | 45.6         |
| Asx                       | 42.2         |
| Pro                       | 25.2         |
| Glx*                      | 59.4         |
| Met                       | 26.7         |
| Phe                       | 22.2         |
| Lys*                      | 76.0         |
| Tyr                       | 33.4         |
| His                       | 28.2         |

<sup>1</sup>Bootstrap of two-step forward selection based on AIC.

<sup>2</sup>Asterisked covariates were selected in the final AS model.

## References

1. Tasevska, N.; Sagi-Kiss, V.; Palma-Duran, S.A.; Barrett, B.; Chaloux, M.; Commins, J.; O'Brien, D.M.; Johnston, C.S.; Midthune, D.; Kipinis, V.; et al. Investigating the performance of 24-h urinary sucrose and fructose as a biomarker of total sugars intake in US participants—a controlled feeding study. *Am. J. Clin. Nutr.* **2021**, *114*, 721–730. <https://doi.org/10.1093/ajcn/nqab158>.
2. O'Brien, D.M.; Boggs, C.L.; Fogel, M.L. The amino acids used in reproduction by butterflies: A comparative study of dietary sources using compound-specific stable isotope analysis. *Physiol. Biochem. Zool.* **2005**, *78*, 819–827. <https://doi.org/10.1086/431191>.
